# Supplementary material for: Tuning solvatochromism and F − sensing via acceptor stoichiometry-mediated charge-transfer modulation in triarylboron-indolocarbazole systems
Source: Royal Society of Chemistry journal article supplement (doi:10.1039/d5cc07002c), 2026-01-01
Supplement: d5cc07002c1.pdf [file d5cc07002c1.pdf]

## Supplementary Information

for

**Tuning solvatochromism and F<sup>-</sup> sensing via acceptor stoichiometry-mediated charge-transfer modulation in triarylboron-indolocarbazole systems**

Man Qin,<sup>a</sup> Chenghui Wang,<sup>a</sup> Chunliang Yang,<sup>a</sup> Wenfeng Zhao,<sup>a</sup> Nan Jiang,<sup>a</sup> Qingmei Ge,<sup>a</sup> Yun Ma <sup>\*b</sup> and Jiang Zhao <sup>\*a</sup>

<sup>a</sup> *School of Chemistry and Chemical Engineering, Guizhou University, Guiyang 550025, Guizhou, P. R. China. E-mail: jiangzhao@gzu.edu.cn*

<sup>b</sup> *State Key Laboratory of Flexible Electronics (LoFE) & Institute of Advanced Materials (IAM), Nanjing University of Posts & Telecommunications, Nanjing, China.*

### ***General information***

Under the condition of nitrogen, the Suzuki coupling reactions are carried out with Schlenk technique. All reagents used shall be used as received. Thin layer chromatography silica gel plate was used to monitor the reaction. Fast column chromatography using 200-300 mesh silica gel purchased by Qingdaohaiyang Chemical Company, Shandong, China.

### ***Reagents***

Tetrakis(triphenylphosphine)palladium were prepared from literatures<sup>1</sup>, acetic acid, 1,2-cyclohexanedione, bromobutane, 4-Bromophenylhydrazine hydrochloride, *N*-bromosuccinimide (NBS), 2-aminophenol, bis(pinacolato)diboron, Pd(dppf)Cl<sub>2</sub>, sodium carbonate, *p*-iodobenzene, bis(trimethylphenyl) boron fluoride, tetrahydrofuran (THF), *N,N*-dimethylformamide (DMF), tetrabutylammonium salt (F<sup>-</sup>, Cl<sup>-</sup>, Br<sup>-</sup>, I<sup>-</sup>, AcO<sup>-</sup>, BF<sub>4</sub><sup>-</sup>, PF<sub>6</sub><sup>-</sup>, HSO<sub>4</sub><sup>-</sup>, NO<sub>3</sub><sup>-</sup>, ClO<sub>4</sub><sup>-</sup> and H<sub>2</sub>PO<sub>4</sub><sup>-</sup>) were purchased from commercial suppliers ( the Energy Chemical in shanghai of China ), which used without further purification. The organic solvents used in the experiments were all analytically, and the water was secondary deionized water.

### ***Apparatus***

NMR spectra were acquired on JNM-ECZ400s MHz nuclear magnetic resonance (NMR) spectrometer at room temperature using CDCl<sub>3</sub> and DMSO-*d*<sub>6</sub> as solvent. High resolution TOF-MS data were recorded at the Agilent 6545 Q-TOF LC/MS. The UV-Vis absorption spectra and the photoluminescence (PL) spectra were obtained by UV-2700 double beam UV-visible spectrophotometer, and a Varian Cary Eclipse fluorescence spectrometer or a CCD spectrophotometer (Simtrum, M/200-1000C), respectively.

### ***Relative Quantum Yield Calculation***

Calculate the relative quantum yield using the following equation with quinine sulfate as the reference standard (in 0.1 M H<sub>2</sub>SO<sub>4</sub>):

$$Q_S = Q_R \times \frac{I_S}{I_R} \times \frac{A_R}{A_S} \times \frac{\eta_S^2}{\eta_R^2}$$

where “ $Q$ ” represents the quantum yield, “ $I$ ” represents the integral area of the sensor emission spectrum, “ $A$ ” represents the absorbance measured at the excitation wavelength, “ $\eta$ ” represents the refractive index of the solvent used, and the subscripts “ $S$ ” and “ $R$ ” represent the reference object and the test object, respectively.

### ***Limit of Detection (LOD)***

The limit of detection for  $F^-$  is determined according to the following relationship:

$$LOD = \frac{3\sigma c}{k} \quad \text{Eq 1}$$

$\sigma$ :

First, the fluorescence intensities of the blank sensor solutions ICZ-1B and ICZ-2B were tested by PL spectra for 20 times (**Fig. S6**). Then, the average values ( $\mu$ ) of these fluorescence intensities are calculated. After that, the standard deviations were calculated according to the related formula from a textbook.<sup>2</sup> Here, the calculations of standard deviations are conducted on the Origin software.

$$\sigma = \sqrt{\frac{\sum_{i=1}^n (x_i - \mu)^2}{n}} \quad \text{Eq 2}$$

$k$ :

Fluorescence intensities of the samples of sensor solutions adding with different multiplicities of  $F^-$  solutions were obtained. Then, calibration curves between fluorescence intensities and  $F^-$  contents are constructed (**Fig. 2k** and **2l** in the main-text). Finally, the values of  $k$  are obtained from the linear fitting results of the calibration curves, which are the slopes of the fitting curves. The fitting operations are conducted on the Origin software

$c$ : Molar concentration of sensors solutions.

### ***Photophysical properties***

Dissolve **ICZ-1B** and **ICZ-2B** in various solvents to obtain a reserve solution with a concentration of  $2.0 \times 10^{-5}$  M, including, DMF, acetone (Ace), dichloromethane (DCM), THF, ethyl acetate (EA), chloroform (CHL), 1,4-dioxane (Diox), diethyl ether ( $\text{Et}_2\text{O}$ ), toluene (Tol), petroleum ether (PE), tested using UV-Vis absorption and PL spectra.

### ***Anion sensing studies***

The stock THF solutions of probes **ICZ-1B** and **ICZ-2B** solution at  $2.0 \times 10^{-3}$  M were diluted 100 times to obtain a final concentration for  $2.0 \times 10^{-5}$  M, and the tetrabutylammonium salts solutions of each anion were prepared as  $2.0 \times 10^{-3}$  M in THF. The anion solutions were added to the probe solution, the spectral data were recorded by UV-Vis and PL spectra, the changes in the spectra data were analyzed to explore the probe's selectivity to anions.

### ***$^{19}\text{F}$ NMR titration experiment***

3.5 mg (**ICZ-1B**) and 5.1 mg (**ICZ-2B**) of the sensors were dissolved in 500  $\mu\text{L}$  of  $\text{CDCl}_3$  to prepare blank sensor solutions with a concentration of  $1.0 \times 10^{-2}$  M. Meanwhile, an  $\text{F}^-$  solution with a concentration of  $2.0 \times 10^{-1}$  M was prepared in  $\text{CDCl}_3$ . Subsequently,  $^{19}\text{F}$  NMR spectra of the ion-sensor mixtures were acquired by varying the equivalent amounts of ions.

### ***Theoretical Calculations***

The ground state geometry ( $S_0$ ) is optimized and obtained from density functional theory (DFT) calculations under the PBE1PBE/6-31G level. The time-dependent density functional theory (TD-DFT) calculations under the PBE1PBE/6-311G\* level. All the calculations are done using Gaussian 16 software,<sup>3</sup> and the SMD solvation model (solvent = tetrahydrofuran) is used. For calculation convenient, the n-Bu groups have been replaced with methyl groups.

**Synthesis details for the ICZ-1B and ICZ-2B, and other compounds.**

The final compounds are named **ICZ-1B** and **ICZ-2B**.

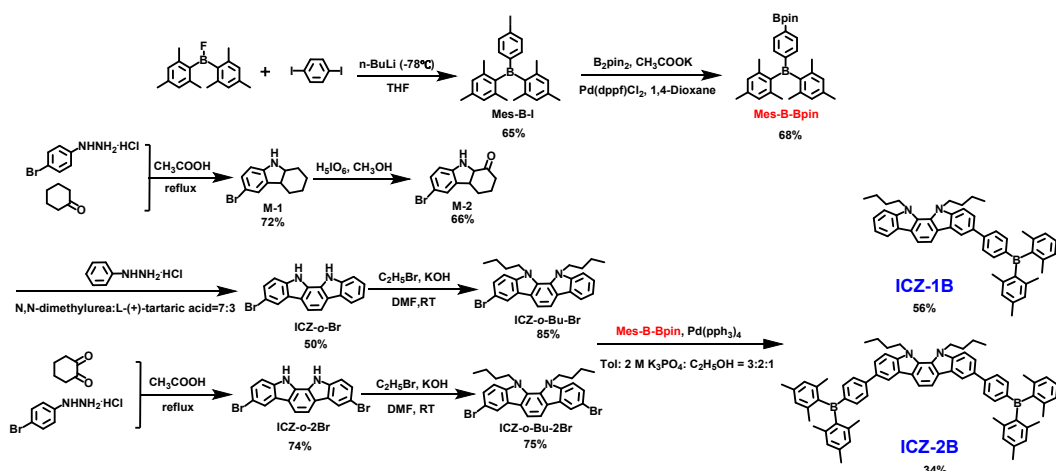

**Scheme S1.** Synthesis route for **ICZ-1B** and **ICZ-2B**.

**M-1:** In a 100 mL Schlenk tube, 4-Bromophenylhydrazine hydrochloride (2.74 g, 1.2 mmol) was added in batches within 30 min to a solution of cyclohexanone (1.00 g, 1.0 mmol) in CH<sub>3</sub>COOH (15 mL). Heated under reflux at 120°C for 8 h, the reaction was complete. The reaction mixture was cooled to room temperature, filtered with ice water to obtain a yellow crude product, eluted with PE: EA (V: V = 4:1) as the eluent, and purified by column chromatography to obtain a white solid. Yield: 72%. <sup>1</sup>H NMR (400 MHz, DMSO-*d*<sub>6</sub>) δ 10.87 (s, 1H), 7.48 (d, *J* = 1.9 Hz, 1H), 7.20 (d, *J* = 8.4 Hz, 1H), 7.08 (dd, *J* = 8.5, 2.0 Hz, 1H), 2.69 (t, *J* = 5.8 Hz, 2H), 2.58 (s, 2H), 1.96 – 1.61 (m, 4H).

**M-2:** Periodic acid (0.90 g, 1.0 mmol) and 10 mL of methanol were added to a 100 mL round-bottom flask and stirred at room temperature for 30 min. The reaction solution was cooled to -10°C, and then **M-1** (1.00g, 1.0 mmol) methanol (15 mL) solution was slowly added dropwise to the reaction mixture. After the dropwise addition was completed, the reaction solution was naturally raised to room temperature and the

reaction took 2 h. Finally, pure water was added and filtered to obtain a pale-yellow crude product, with PE: EA (V: V = 5:1) as the eluent, and purified by column chromatography to obtain a white solid. Yield: 66%.  $^1\text{H}$  NMR (400 MHz,  $\text{DMSO-}d_6$ )  $\delta$  11.81 (s, 1H), 7.90 (s, 1H), 7.40 (d,  $J$  = 10.6 Hz, 1H), 7.35 (d,  $J$  = 8.8 Hz, 1H), 2.93 (t,  $J$  = 5.9 Hz, 2H), 2.61 – 2.52 (m, 2H), 2.18 – 2.09 (m, 2H).

**ICZ-*o*-Br:** Under the protection of nitrogen atmosphere, 1,3-dimethyl urea: L-tartaric acid (m: m = 7:3) was first added to 100 mL of Schlenk tube, and heated to 80°C to melt, then 1,2-cyclohexanedione (0.81 g, 1.5 mmol) and **M-2** (1.00 g, 1.0 mmol) were added after 1 h, and the reaction was carried out for 4 h to obtain a brick-red solution. Cooled to room temperature, pure water was added to filter to obtain a light red crude product, and PE: EA (V: V = 5:1) was used as the eluent, and the white solid was purified by column chromatography. Yield: 50%.  $^1\text{H}$  NMR (400 MHz,  $\text{DMSO-}d_6$ )  $\delta$  11.22 (s, 1H), 11.12 (s, 1H), 8.39 (s, 1H), 8.16 (d,  $J$  = 7.7 Hz, 1H), 7.94 (d,  $J$  = 3.0 Hz, 2H), 7.68 (t,  $J$  = 8.3 Hz, 2H), 7.50 (d,  $J$  = 8.6 Hz, 1H), 7.40 (t,  $J$  = 7.6 Hz, 1H), 7.21 (t,  $J$  = 7.3 Hz, 1H).

**ICZ-*o*-Bu-Br:** To a 100 mL round-bottom flask were added **ICZ-*o*-Br** (1.00 g, 1.0 mmol),  $\text{C}_2\text{H}_5\text{Br}$  (1.20 g, 3.0 mmol), KOH (0.50 g, 3.0 mmol), and 15 mL DMF to give a pale-yellow solution. The reaction was completed at room temperature for 7 h. Finally, white solid was obtained by column chromatography with PE: DCM (V: V = 3:1) as eluent. Yield: 85%.  $^1\text{H}$  NMR (400 MHz,  $\text{CDCl}_3$ )  $\delta$  8.24 (d,  $J$  = 1.6 Hz, 1H), 8.14 (d,  $J$  = 7.7 Hz, 1H), 7.96 (d,  $J$  = 7.9 Hz, 1H), 7.88 (d,  $J$  = 8.4 Hz, 1H), 7.56 (t,  $J$  = 8.9 Hz, 2H), 7.49 (t,  $J$  = 7.6 Hz, 1H), 7.42 (d,  $J$  = 8.6 Hz, 1H), 7.32 (t,  $J$  = 7.4 Hz, 1H), 4.56 (dq,  $J$  = 7.9, 4.2 Hz, 4H), 1.65 (dt,  $J$  = 15.9, 7.8 Hz, 4H), 1.17 – 1.00 (m, 4H), 0.83 – 0.72 (m, 6H).

**ICZ-*o*-2Br:** Under the protection of nitrogen atmosphere, to a 100 mL Schlenk tube were added 1, 2-cyclohexanedione (1.00 g, 1.0 mmol) and *p*-bromophenylhydrazine hydrochloride (5.21 g, 2.5 mmol), and 20 mL  $\text{CH}_3\text{COOH}$  was added, followed by heating at reflux for 12 h at 120°C. After cooling to room temperature, pure water was

added and filtered to obtain yellow crude product, which was purified by column chromatography with PE: EA (V: V = 2:1) as eluent to obtain white solid. Yield: 74%.  $^1\text{H}$  NMR (400 MHz,  $\text{DMSO}-d_6$ )  $\delta$  11.28 (s, 2H), 8.40 (s, 2H), 7.97 (s, 2H), 7.68 (d,  $J$  = 8.5 Hz, 2H), 7.51 (d,  $J$  = 9.8 Hz, 2H).

**ICZ-*o*-Bu-2Br:** To a 100 mL round-bottom flask were added, **ICZ-*o*-2Br** (1.00 g, 1.0 mmol),  $\text{C}_2\text{H}_5\text{Br}$  (0.99 g, 3.0 mmol), KOH (0.41 g, 3.0 mmol), and 15 mL DMF to give a pale yellow solution. The reaction was completed at room temperature for 7 h. Finally, white solid was obtained by column chromatography with PE: DCM (V: V = 6:1) as eluent. Yield: 75%.  $^1\text{H}$  NMR (400 MHz,  $\text{CDCl}_3$ )  $\delta$  8.21 (d,  $J$  = 2.0 Hz, 2H), 7.87 (s, 2H), 7.54 (dd,  $J$  = 8.6, 1.9 Hz, 2H), 7.41 (d,  $J$  = 8.6 Hz, 2H), 4.59 – 4.46 (m, 4H), 1.62 (t,  $J$  = 7.6 Hz, 4H), 1.05 (h,  $J$  = 7.4 Hz, 4H), 0.76 (t,  $J$  = 7.3 Hz, 6H).

**Mes-B-I:** Under the protection of nitrogen atmosphere, *p*-iodobenzene (5.90 g, 1.2 mmol) and 40 mL of THF were added to a 100 mL three-necked flask, stirred at room temperature for 10 min. Then, the three-necked flask was placed in an insulating bottle containing liquid nitrogen, maintaining a temperature of  $-78^\circ\text{C}$ , and *n*-BuLi (14 mL, 1.2 mmol) was slowly added while maintaining a certain temperature. After the addition was complete, the reaction was continued for 1 h. After transferring to room temperature, bis(trimethylphenyl) boron fluoride (4.00 g, 1.0 mmol) was added to the three-necked flask, and the reaction was continued until complete. Finally, the organic phase was obtained by filtering with ice water, eluted with PE: DCM (V: V = 10:1) as the eluent, and purified by column chromatography to obtain a white solid. Yield: 65%.  $^1\text{H}$  NMR (400 MHz,  $\text{CDCl}_3$ )  $\delta$  7.70 (d,  $J$  = 8.1 Hz, 2H), 7.21 (d,  $J$  = 8.1 Hz, 2H), 6.81 (s, 4H), 2.30 (s, 6H), 1.98 (s, 12H).

**Mes-B-Bpin:** Under the protection of nitrogen atmosphere, **Mes-B-I** (2.00 g, 1.0 mmol),  $\text{B}_2\text{pin}_2$  (3.37 g, 3.0 mmol),  $\text{CH}_3\text{COOK}$  (1.30 g, 3.0 mmol),  $\text{Pd}(\text{dppf})\text{Cl}_2$  (0.32 g, 0.1 mmol) were added to a 100 mL Schlenk tube, and 20 mL of 1,4-dioxane was added, and the reaction was continued at  $80^\circ\text{C}$  for 12 h until the reaction was complete. Finally, it was cooled to room temperature, and PE: DCM (V: V = 6:1) was used as the

eluent, and the white solid was purified by column chromatography. Yield: 68%.  $^1\text{H}$  NMR (400 MHz,  $\text{CDCl}_3$ )  $\delta$  7.78 (d,  $J = 7.7$  Hz, 2H), 7.52 (d,  $J = 7.8$  Hz, 2H), 6.83 (s, 4H), 2.32 (s, 6H), 1.99 (s, 12H), 1.36 (s, 12H).

### Synthesis of ICZ-1B and ICZ-2B

Under the protection of nitrogen atmosphere, 50 mL of Schlenk tube was added with **ICZ-*o*-Bu-Br** (2.00 g, 1.0 mmol)/ **ICZ-*o*-Bu-2Br** (2.00 g, 1.0 mmol), **Mes-B-pin** (2.30 g, 1.2 mmol/3.58 g, 2.2 mmol),  $\text{Pd}(\text{pPh}_3)_4$  (0.52 g, 0.1 mmol/0.44 g, 0.1 mmol) and Tol: 2 M  $\text{K}_3\text{PO}_4$ : ethanol (V: V: V = 3:2:1) mixed solution, heated and refluxed for 5 h, eluted with PE: DCM (V: V = 6:1) as eluent, and the product was obtained after column chromatography purification.

**ICZ-1B** is a pale-yellow solid. Yield: 56%.  $^1\text{H}$  NMR (400 MHz,  $\text{CDCl}_3$ )  $\delta$  8.39 (s, 1H), 8.12 (d,  $J = 7.6$  Hz, 1H), 8.00 – 7.94 (m, 2H), 7.75 (dd,  $J = 15.1, 8.3$  Hz, 3H), 7.64 – 7.61 (m, 3H), 7.59 – 7.54 (m, 1H), 7.46 (t,  $J = 7.6$  Hz, 1H), 7.29 (t,  $J = 7.4$  Hz, 1H), 6.85 (s, 4H), 4.59 (q,  $J = 8.8$  Hz, 4H), 2.32 (s, 6H), 2.07 (s, 12H), 1.69 – 1.65 (m, 4H), 1.11 (dt,  $J = 14.6, 7.2$  Hz, 4H), 0.78 (td,  $J = 7.4, 4.0$  Hz, 6H).  $^{13}\text{C}$  NMR (101 MHz,  $\text{CDCl}_3$ )  $\delta$  145.48, 143.30, 143.09, 141.98, 140.96, 138.60, 137.50, 137.36, 132.99, 130.40, 130.02, 128.47, 128.36, 128.17, 128.06, 126.76, 126.07, 124.68, 124.46, 120.11, 118.51, 113.30, 111.63, 48.33, 31.24, 23.66, 21.43, 20.15, 13.83. TOF-MS (ESI):  $m/z$  calculated for  $\text{C}_{50}\text{H}_{53}\text{BN}_2$ : 692.4364[M] $^+$ , observed : 693.4364[M+H] $^+$ .

**ICZ-2B** is a pale-yellow solid. Yield: 34%.  $^1\text{H}$  NMR (400 MHz,  $\text{CDCl}_3$ )  $\delta$  8.41 (s, 2H), 8.03 (s, 2H), 7.77 (dd,  $J = 17.6, 8.2$  Hz, 6H), 7.63 (dd,  $J = 12.4, 8.2$  Hz, 6H), 6.87 (s, 8H), 4.62 (t,  $J = 7.4$  Hz, 4H), 2.34 (s, 12H), 2.09 (s, 1.76, 24H), 1.73 – 1.70 (m, 4H), 1.15 – 1.10 (m, 4H), 0.80 (t,  $J = 7.4$  Hz, 6H).  $^{13}\text{C}$  NMR (101 MHz,  $\text{CDCl}_3$ )  $\delta$  145.41, 143.09, 141.95, 140.95, 138.59, 137.40, 133.05, 130.40, 128.25, 126.73, 124.82, 118.67, 113.29, 111.69, 48.38, 31.26, 23.64, 21.35, 20.13, 13.81. TOF-MS (ESI):  $m/z$  calculated for: 1016.6393[M] $^+$ , observed: 1017.6393[M+H] $^+$ .



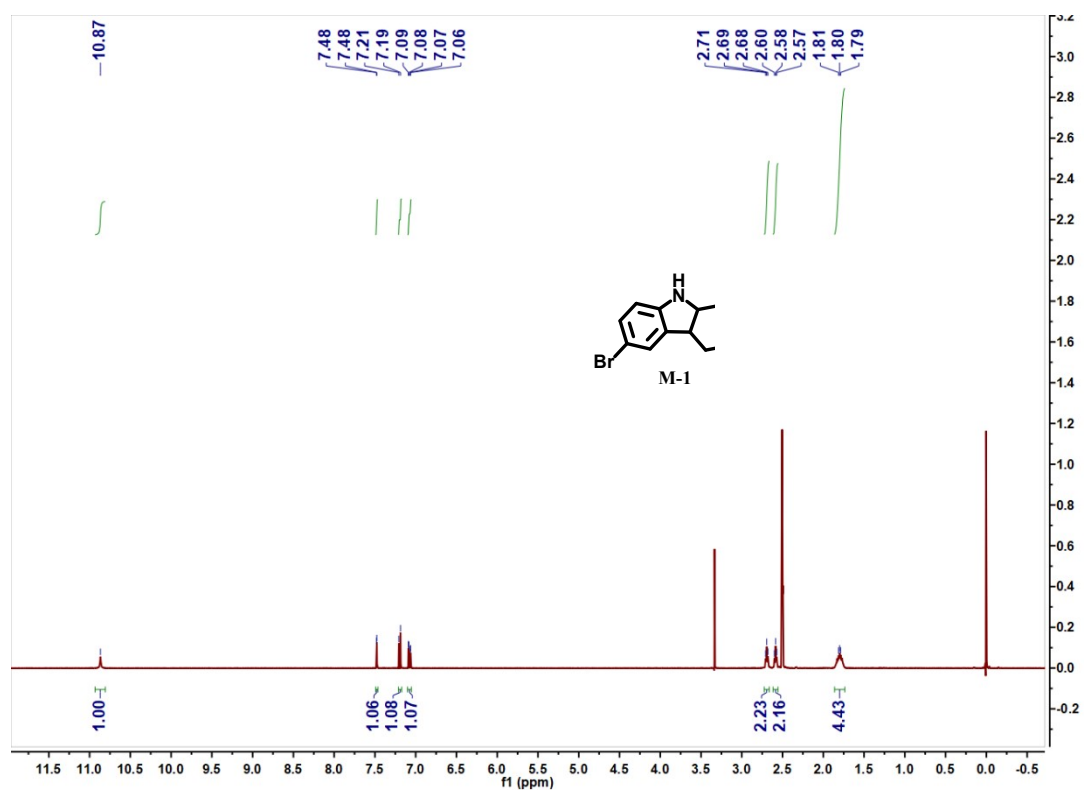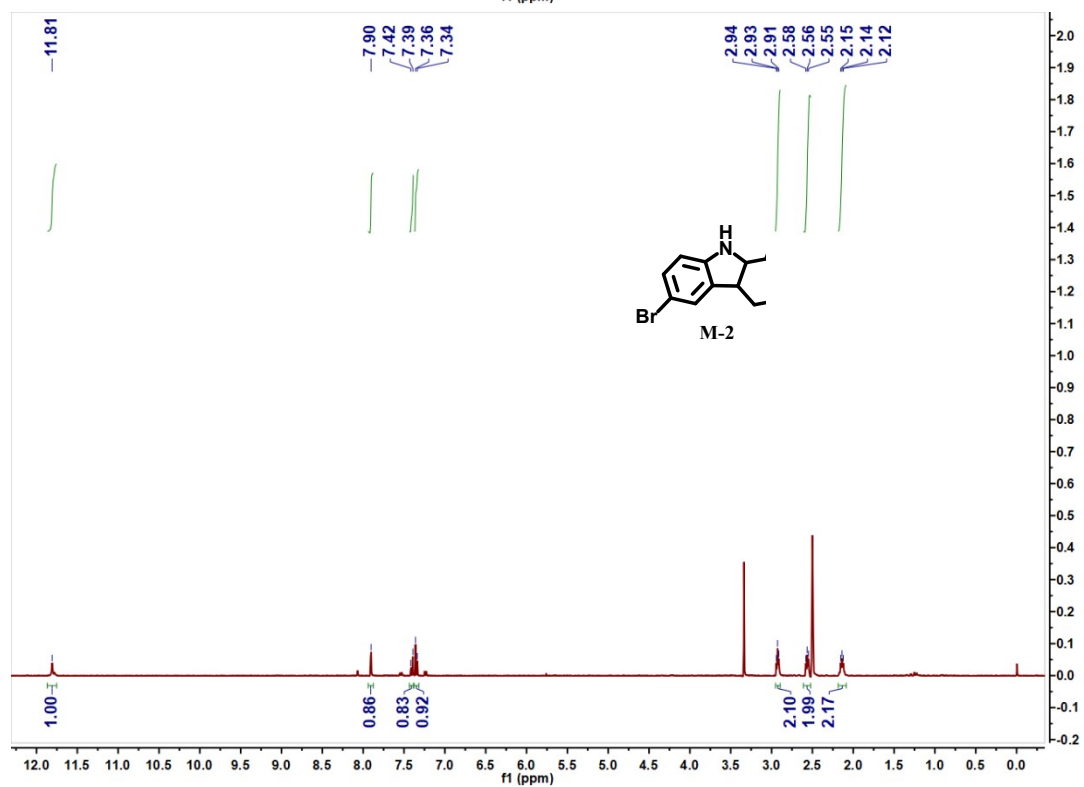

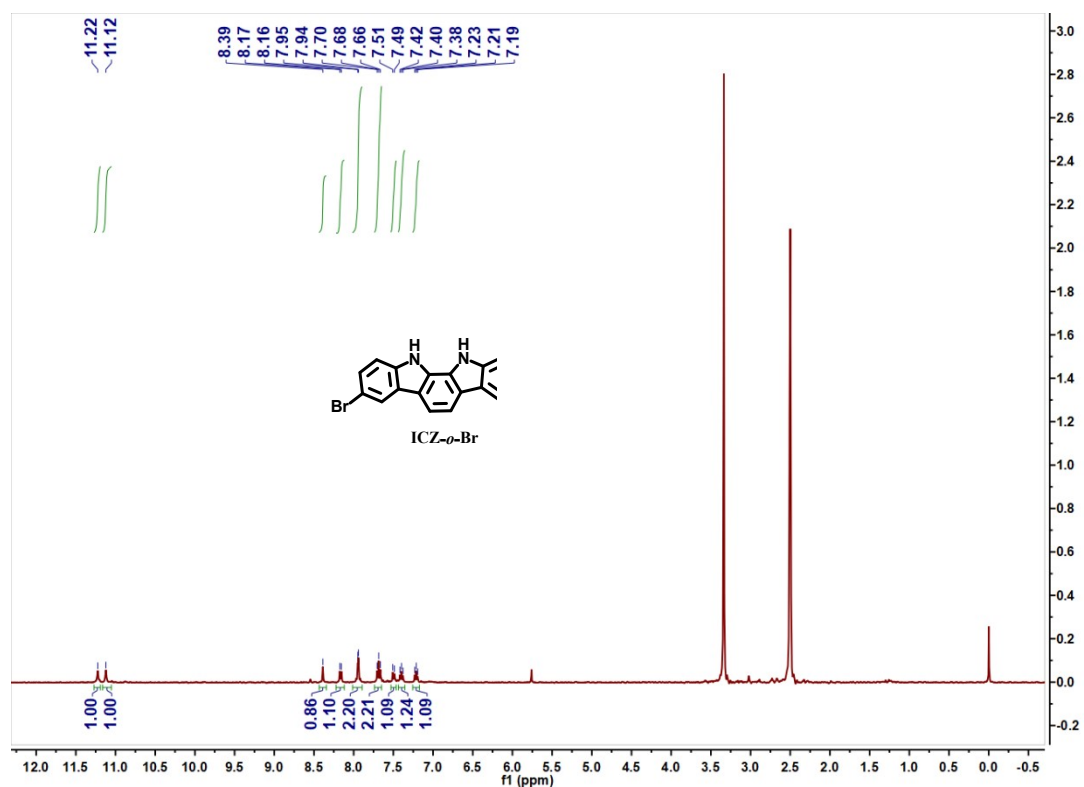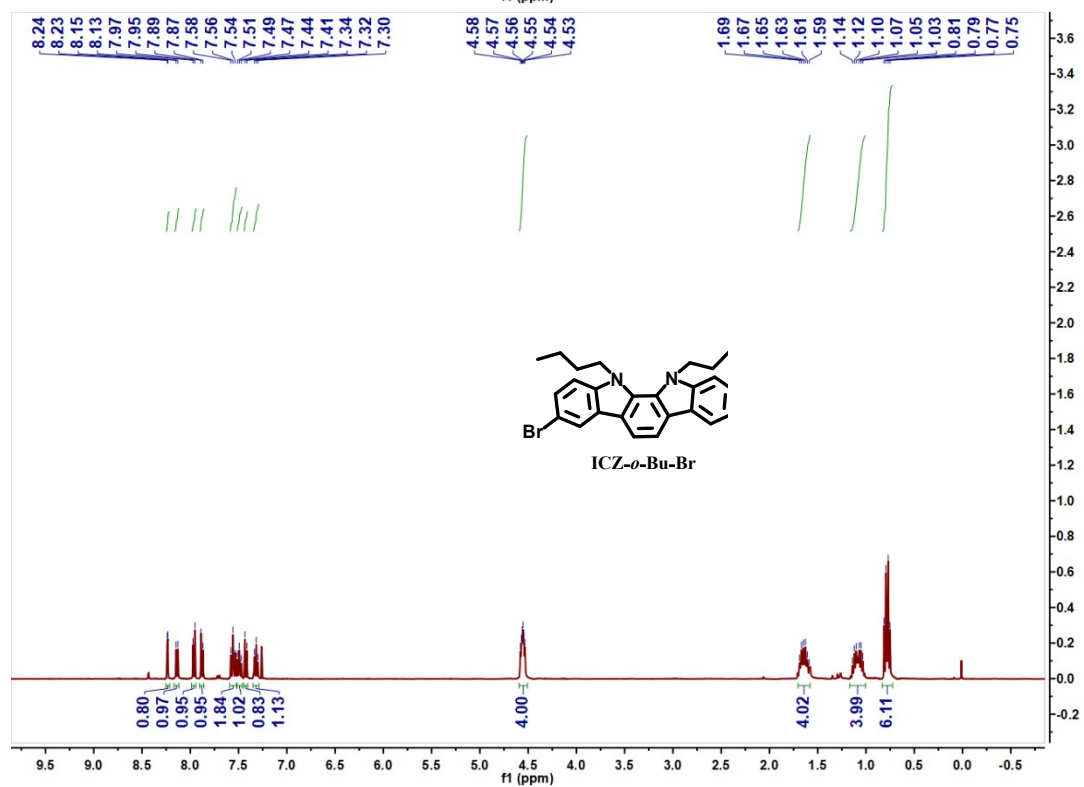

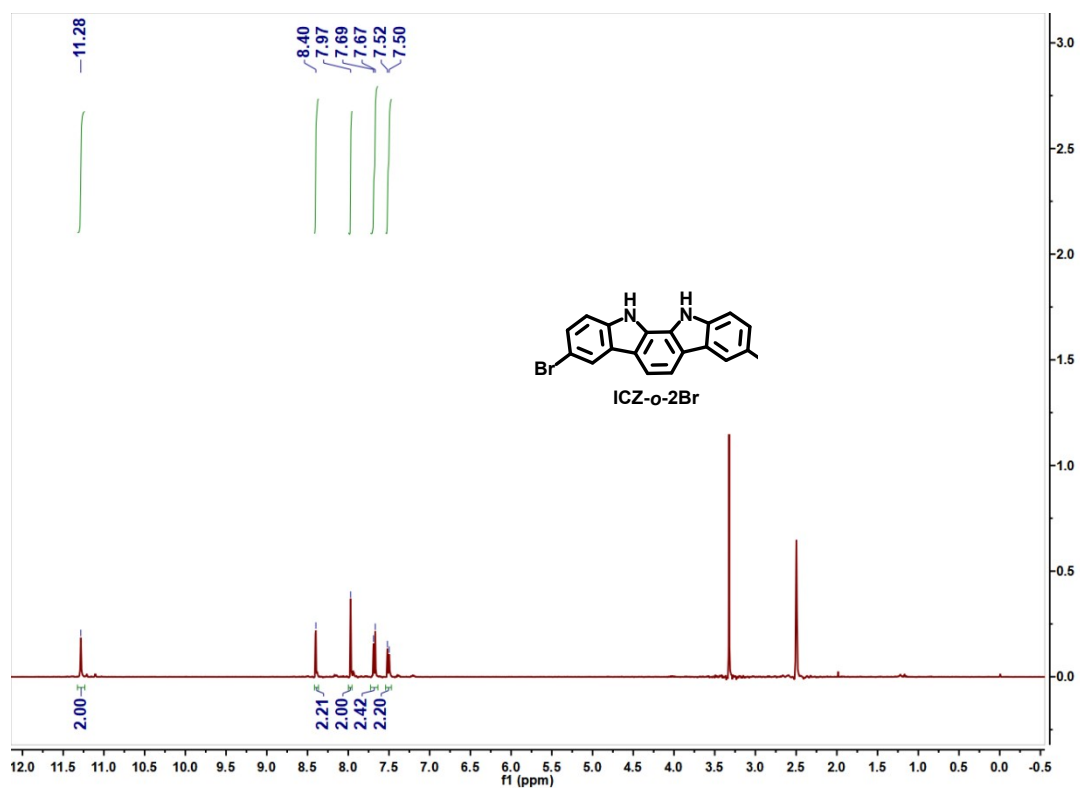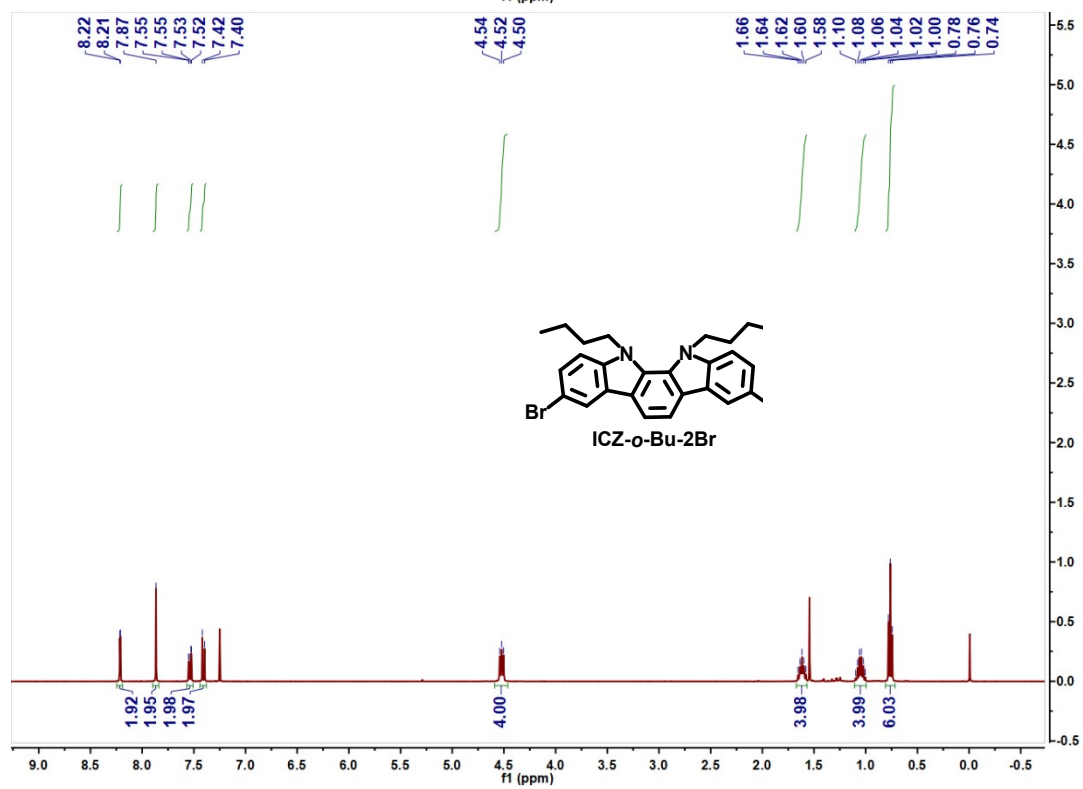

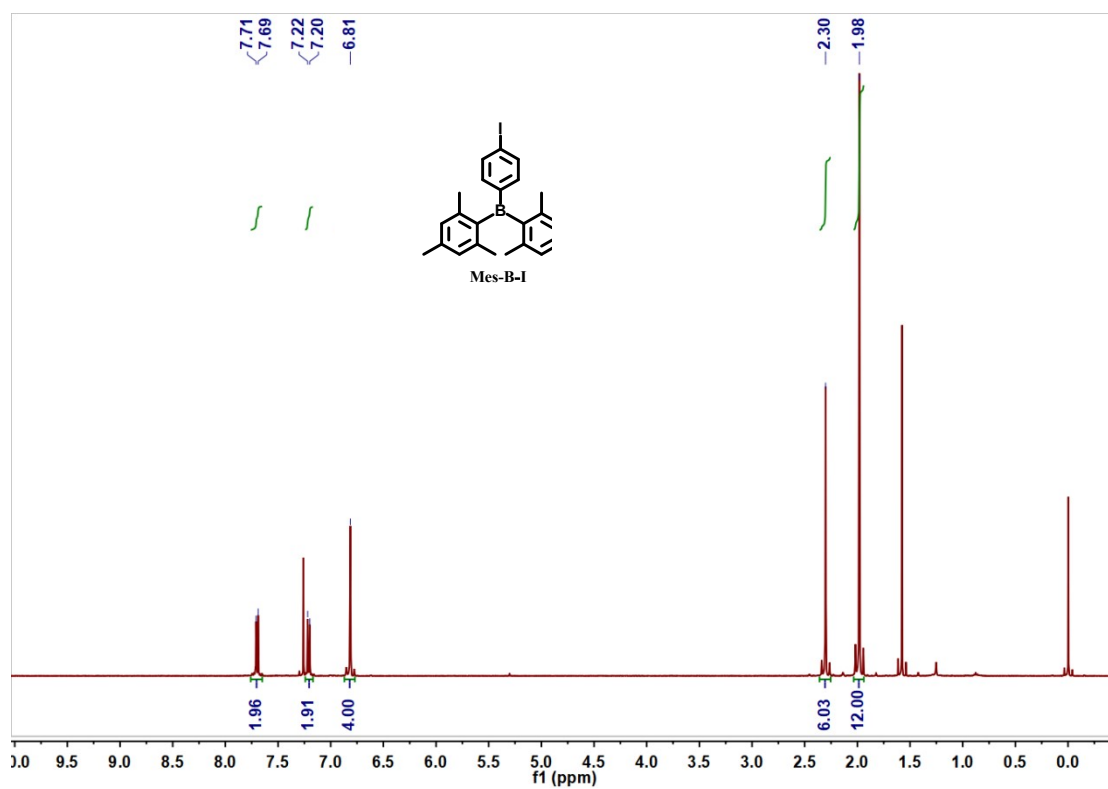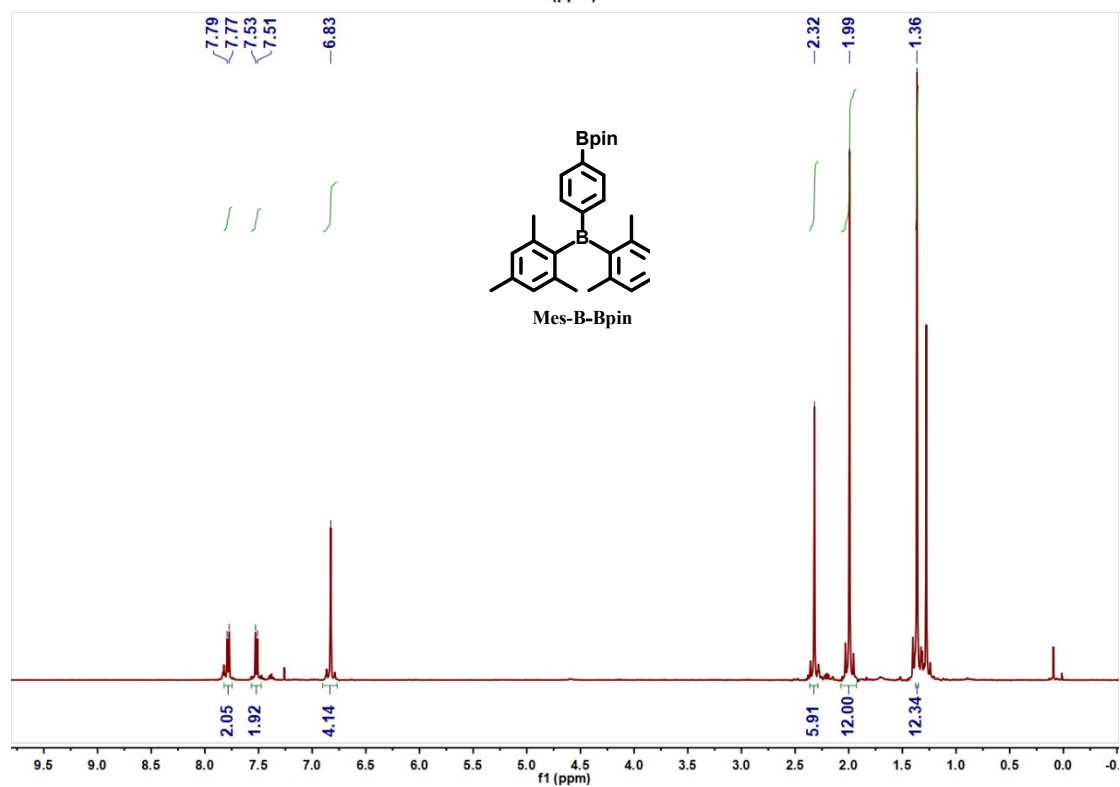



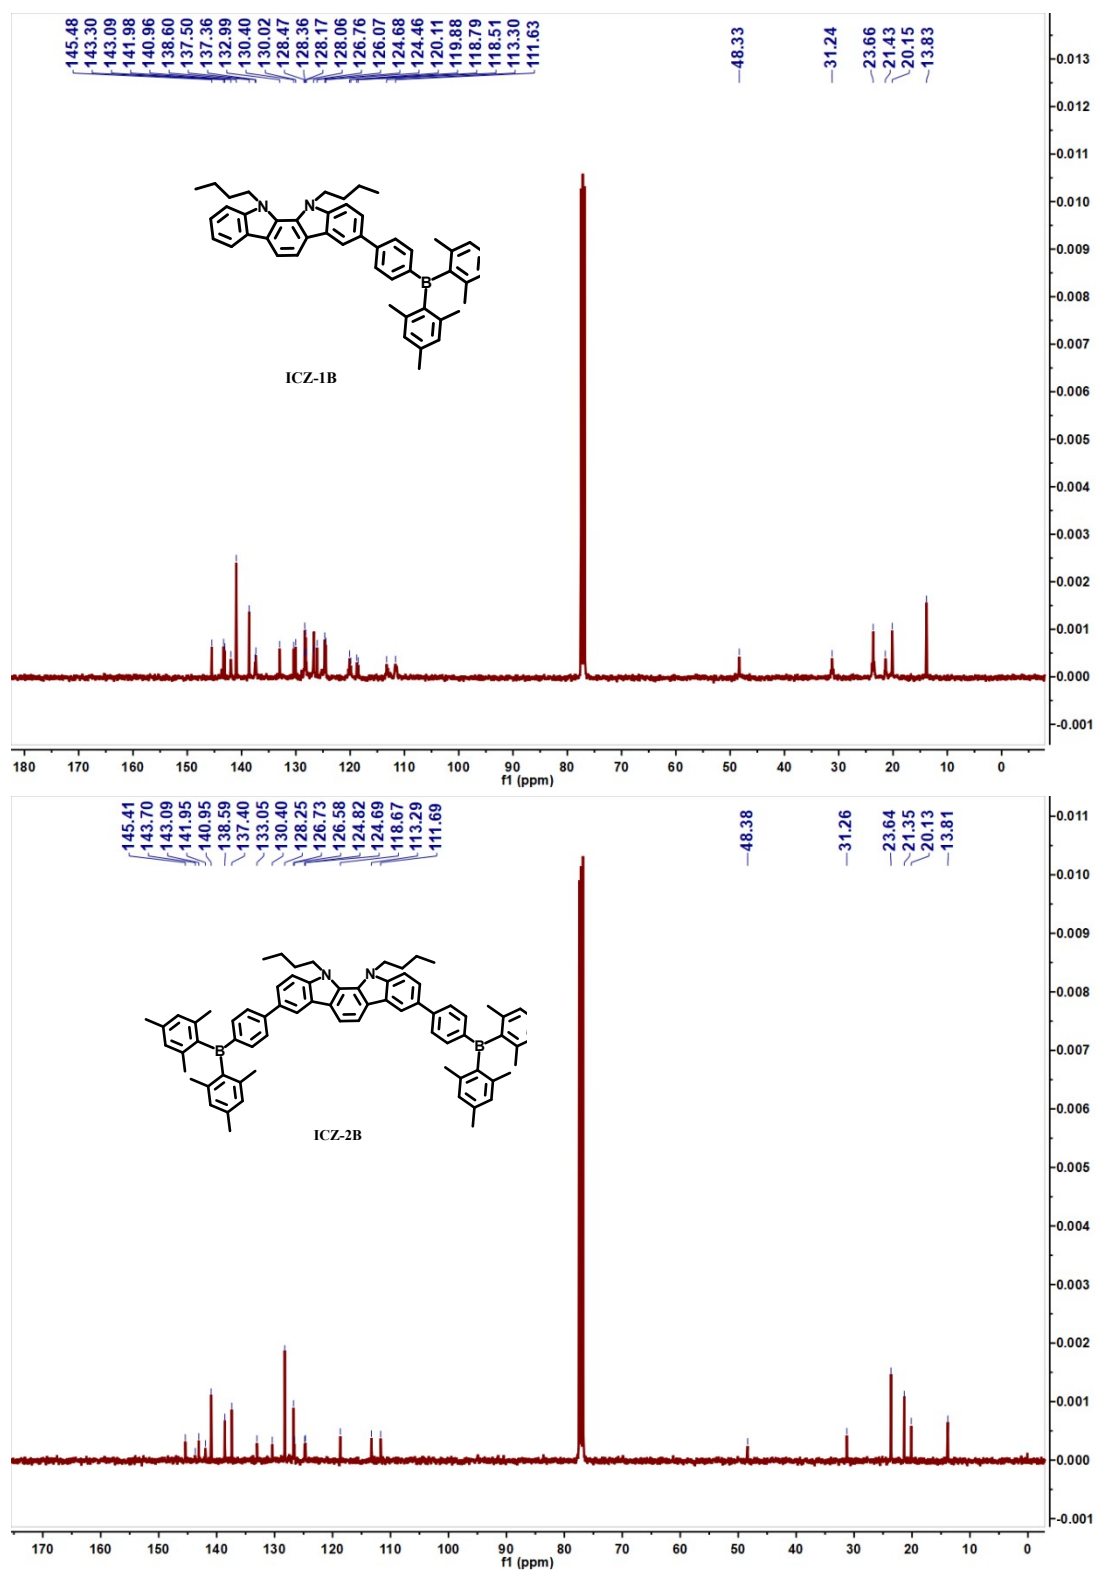

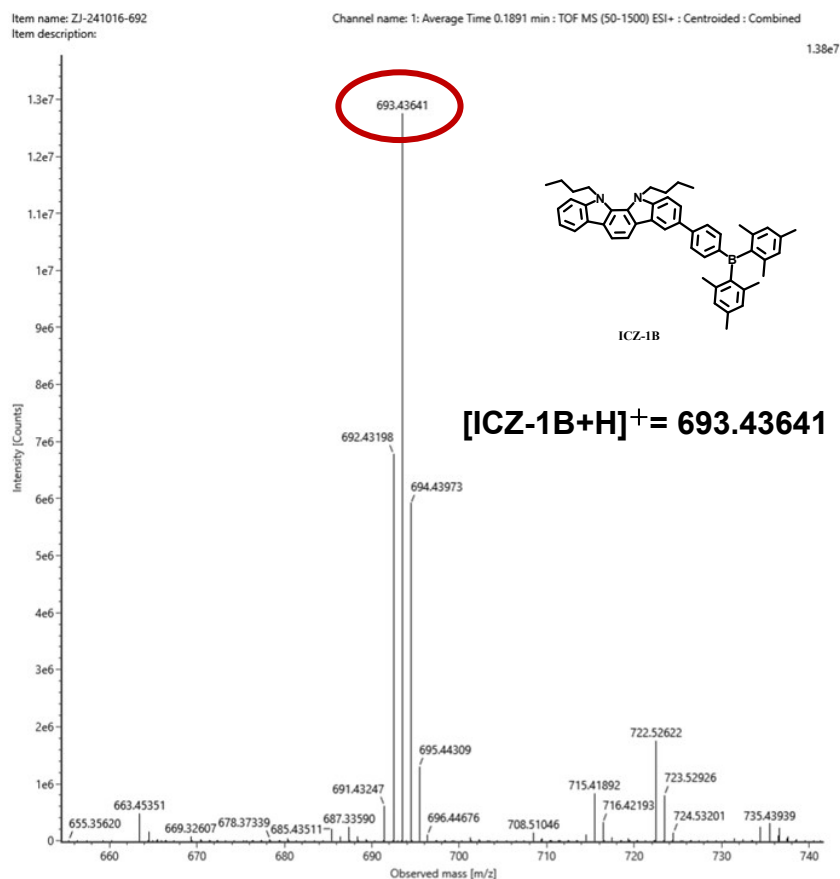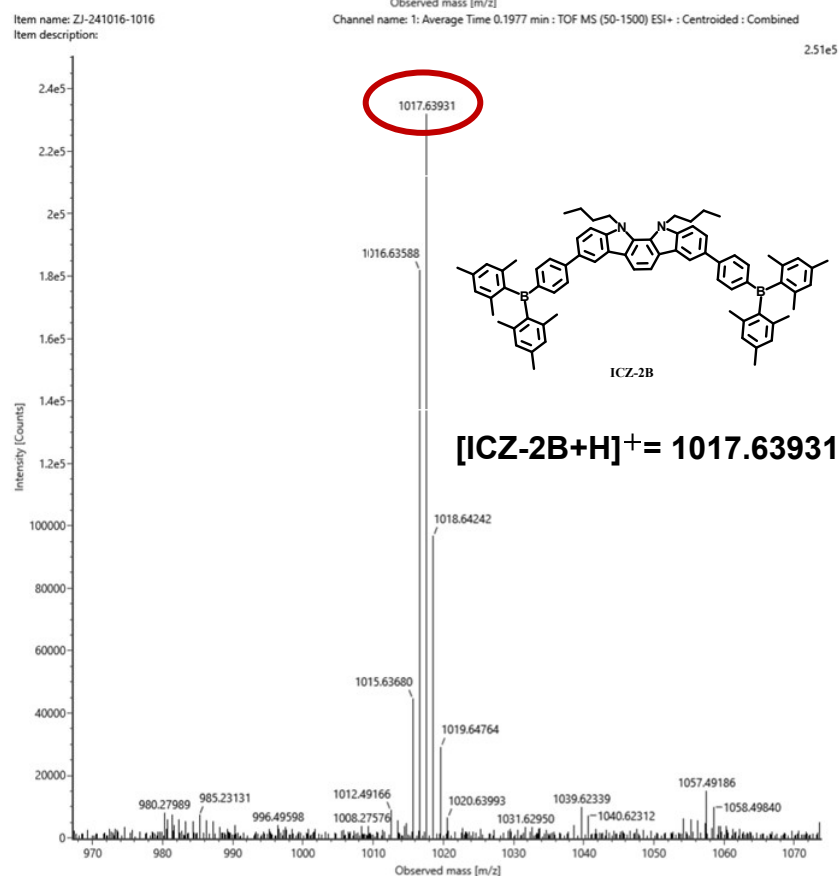

**Fig. S3 High resolution mass spectra of ICZ-1B and ICZ-2B**

**Table S1.** Photophysical properties of ICZ-1B and ICZ-2B in different solvents.

| Solvent           | ICZ-1B     |            |                 |                |        |     |            | ICZ-2B     |                 |                |        |     |            |
|-------------------|------------|------------|-----------------|----------------|--------|-----|------------|------------|-----------------|----------------|--------|-----|------------|
|                   | $E_T(30)$  | $\epsilon$ | $\lambda_{abs}$ | $\lambda_{em}$ | Stokes | $I$ | $\Phi(\%)$ | $\epsilon$ | $\lambda_{abs}$ | $\lambda_{em}$ | Stokes | $I$ | $\Phi(\%)$ |
|                   | (kcal/mol) |            | (nm)            | (nm)           | shift  |     |            |            | (nm)            | (nm)           | shift. |     |            |
|                   |            |            |                 |                | (nm)   |     |            |            |                 |                | (nm)   |     |            |
| DMF               | 43.2       | 38500      | 340             | 524            | 184    | 158 | 2.5        | 56800      | 357             | 535            | 178    | 128 | 2.3        |
| Ace               | 42.2       | 33600      | 339             | 508            | 169    | 105 | 5.3        | 64150      | 356             | 510            | 154    | 141 | 3.2        |
| DCM               | 40.7       | 37550      | 340             | 492            | 152    | 307 | 13.0       | 66000      | 356             | 491            | 135    | 438 | 9.9        |
| CHL               | 39.1       | 40750      | 340             | 468            | 128    | 421 | 13.9       | 62050      | 356             | 466            | 110    | 578 | 11.6       |
| EA                | 38.1       | 33350      | 338             | 480            | 142    | 368 | 14.4       | 71000      | 356             | 474            | 118    | 540 | 9.4        |
| THF               | 37.4       | 35650      | 338             | 480            | 142    | 368 | 14.7       | 86000      | 358             | 477            | 119    | 539 | 11.3       |
| Diox              | 36.0       | 34400      | 339             | 449            | 110    | 428 | 14.9       | 69400      | 356             | 451            | 95     | 678 | 10.8       |
| Et <sub>2</sub> O | 34.5       | 20150      | 337             | 448            | 111    | 501 | 26.5       | 92600      | 354             | 445            | 91     | 815 | 9.0        |
| Tol               | 32.5       | 40600      | 340             | 433            | 93     | 496 | 14.7       | 71750      | 358             | 432            | 74     | 706 | 11.3       |
| PE                | ——         | 56550      | 338             | 410            | 72     | 773 | 12.1       | 67950      | 353             | 411            | 58     | 923 | 10.5       |

$E_T(30)$ : Dimroth and Reichardt solvent polarity parameter.  $I$ : fluorescence intensity.  $\epsilon$ : molar absorption coefficient.  $\Phi$ : fluorescence quantum yield. Quantum yields are determined by using quinine sulfate. ( $\Phi=0.54$  in 0.1 M H<sub>2</sub>SO<sub>4</sub>) as a standard.



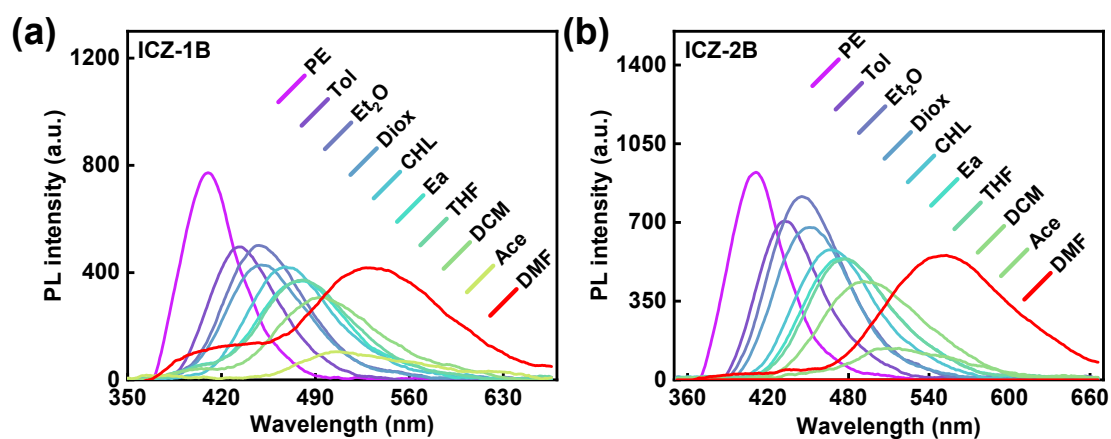

**Fig. S4** Unnormalized fluorescence emission spectra of ICZ-1B (a) and ICZ-2B(b) in different solvents.

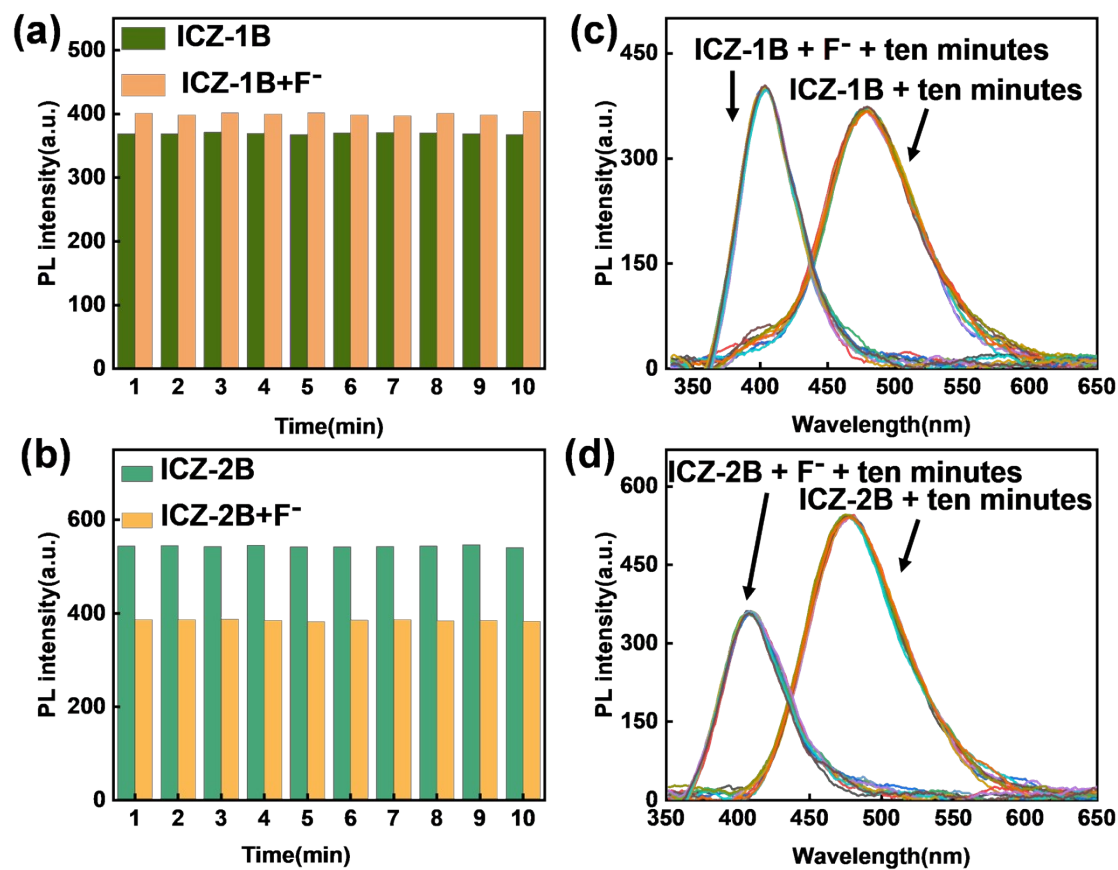

**Fig. S5** ICZ-1B and ICZ-2B (a) and (b) response time results; (c) and (d) fluorescence spectra of fluorine-containing sensor solutions at different times.

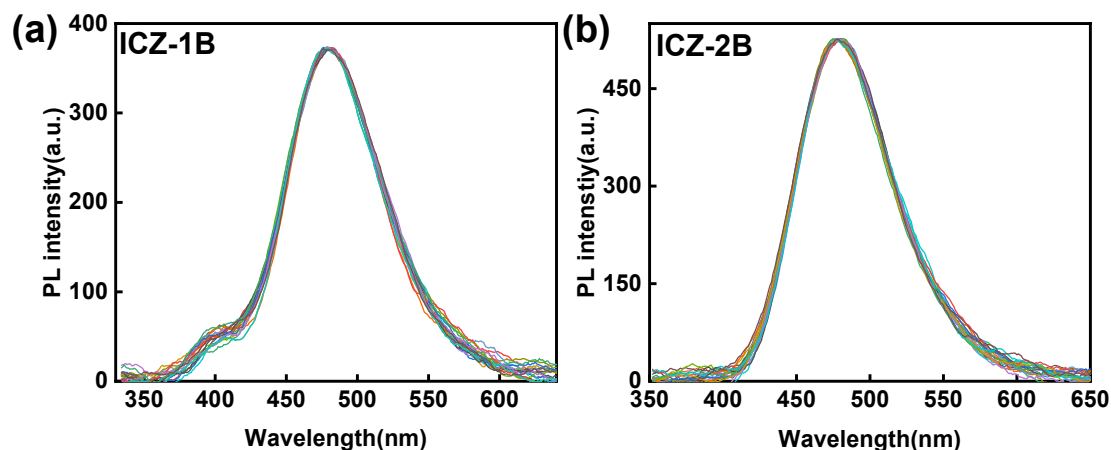

**Fig. S6** Fluorescence spectra of the blank sensor solutions measured with 20 times, and the related standard deviation for **ICZ-1B** was 0.49, for **ICZ-2B** was 0.58.

### Reference:

1. Ioele, M. O., G.; Scarsella, M.; Sleiter, G. . A rapid and convenient synthesis of tetrakis (triphenylphosphine) palladium (O) and-platinum (O) complexes by phase-transfer catalysis. *Polyhedron* **1991**, *10* (20-21), 2475-2476.
2. University, W. *Analytical Chemistry (6th ed., Vol. 1)*; Higher Education Press, 2016:51.
3. Frisch, M. J.; Trucks, G. W.; Schlegel, H. B.; Scuseria, G. E.; Robb, M. A.; Cheeseman, J. R.; Scalmani, G.; Barone, V.; Petersson, G. A.; Nakatsuji, H.; Li, X.; Caricato, M.; Marenich, A. V.; Bloino, J.; Janesko, B. G.; Gomperts, R.; Mennucci, B.; Hratchian, H. P.; Ortiz, J. V.; Izmaylov, A. F.; Sonnenberg, J. L.; Williams-Young, D.; Ding, F.; Lipparini, F.; Egidi, F.; Goings, J.; Peng, B.; Petrone, A.; Henderson, T.; Ranasinghe, D.; Zakrzewski, V. G.; Gao, J.; Rega, N.; Zheng, G.; Liang, W.; Hada, M.; Ehara, M.; Toyota, K.; Fukuda, R.; Hasegawa, J.; Ishida, M.; Nakajima, T.; Honda, Y.; Kitao, O.; Nakai, H.; Vreven, T.; Throssell, K.; Montgomery, J. A., Jr.; Peralta, J. E.; Ogliaro, F.; Bearpark, M. J.; Heyd, J. J.; Brothers, E. N.; Kudin, K. N.; Staroverov, V. N.; Keith, T. A.; Kobayashi, R.; Normand, J.; Raghavachari, K.; Rendell, A. P.; Burant, J. C.; Iyengar, S. S.; Tomasi, J.; Cossi, M.; Millam, J. M.; Klene, M.; Adamo, C.; Cammi, R.; Ochterski, J. W.; Martin, R. L.; Morokuma, K.; Farkas, O.; Foresman, J. B.; Fox, D. J. Gaussian16; Gaussian, Inc.: Wallingford, CT, 2016
